# Supplementary material
Source: PubMed Central journal article supplement (PMC10023507)
Supplement: NIHMS1865159-supplement-Supplemental_Publication_Material.pdf [file NIHMS1865159-supplement-Supplemental_Publication_Material.pdf]

## **Use of Valsalva Maneuver to Detect Late-Onset Delayed Orthostatic Hypotension**

Short title: Valsalva Maneuver and Delayed Orthostatic Hypotension

Jin-Woo Park, Luis E Okamoto, Sung-Hwan Kim, Seol-Hee Baek, Joo Hye Sung, Namjoon Jeon, Alfredo Gamboa, Cyndya A Shibao, André Diedrich, Byung-Jo Kim, and Italo Biaggioni

Department of Neurology, Korea University Medicine, Seoul, Korea (J.-W.P., S.-H.K., S.-H.B., J.H.S., N.J., B.-J.K.), Division of Clinical Pharmacology, Department of Medicine, Vanderbilt University Medical Center, Nashville, TN, USA (J.-W.P., L.E.O., A.G., C.A.S., A.D., I.B.). BK21 FOUR Program in Learning Health Systems, Korea University, Seoul, Korea (B.-J.K.) and Department of Biomedical Engineering, Vanderbilt University, Nashville, TN, USA (A.D.)

### **Correspondence to:**

Byung-Jo Kim, MD, PhD

Department of Neurology, Korea University Anam Hospital, Korea University Medicine,  
73, Goryeodae-ro, Anam-dong, Sungbuk-Gu, Seoul, 02841, Korea

Tel: +82-2-2286-8852, Email: nukbj@korea.ac.kr

**Figure S1**

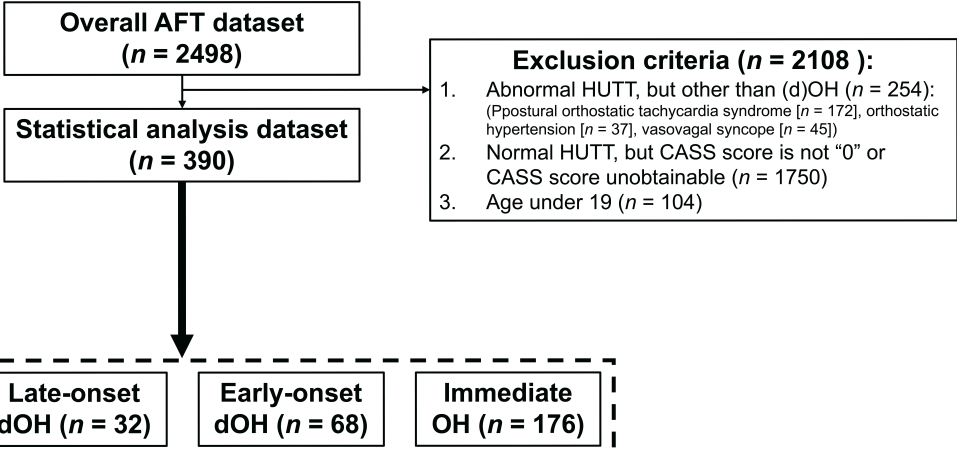



Figure S2

(A)  $\Delta\text{DBP}_{\text{VM2}}$

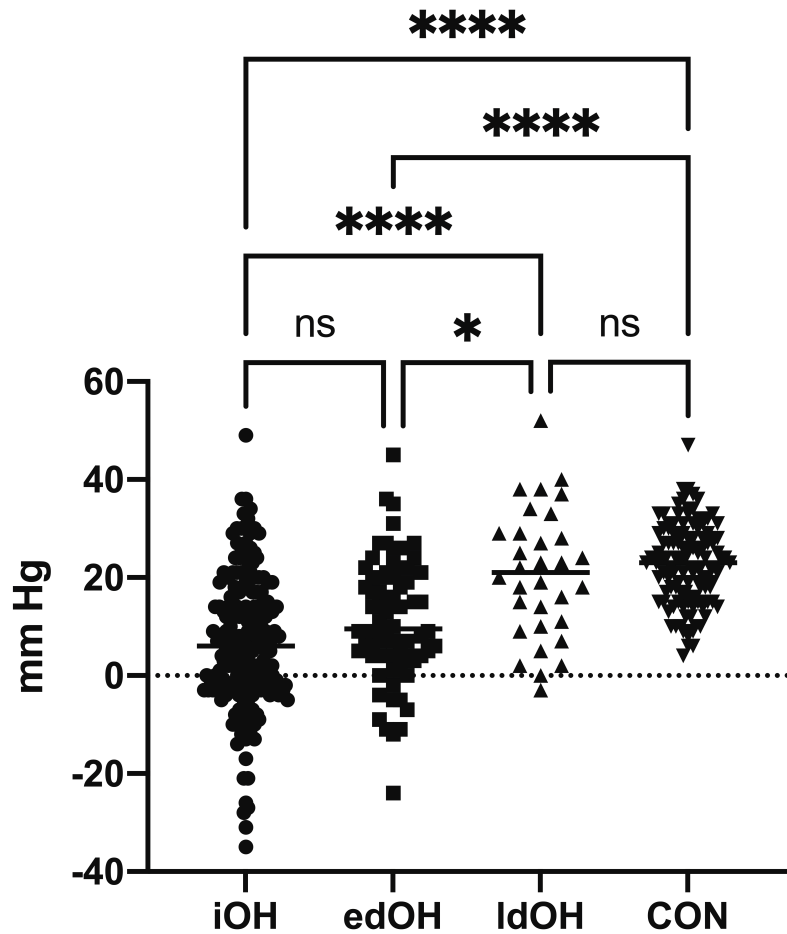

(B)  $\Delta\text{MBP}_{\text{VM2}}$

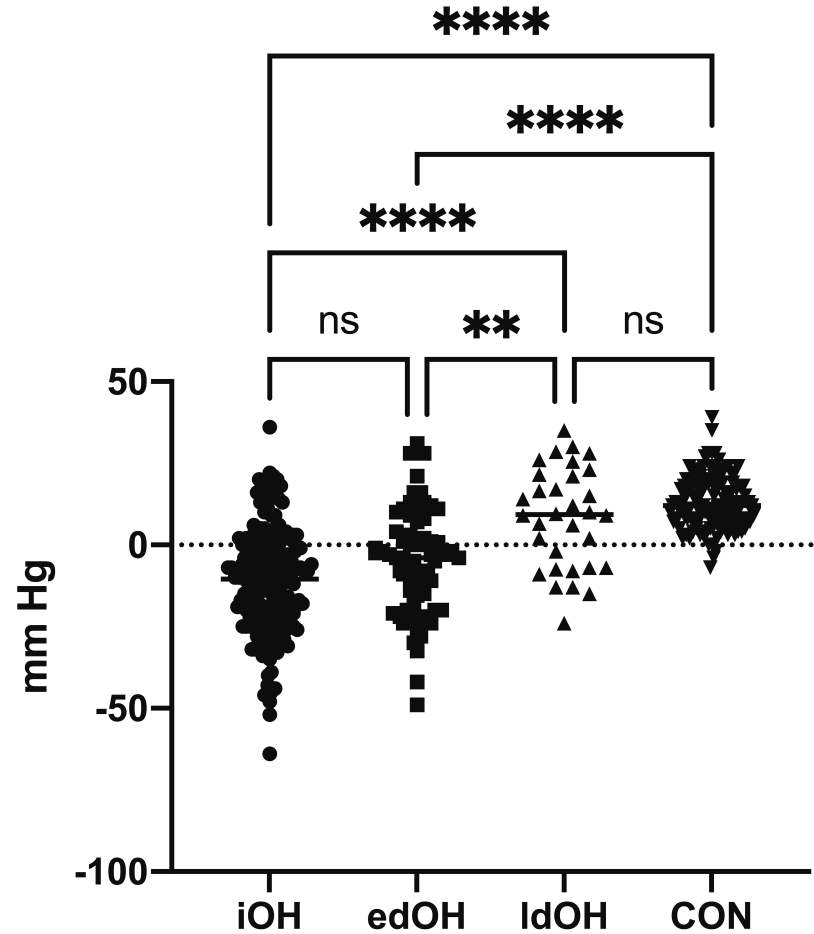

Figure S3

(A)  $\Delta\text{DBP}_{\text{VM2}}$

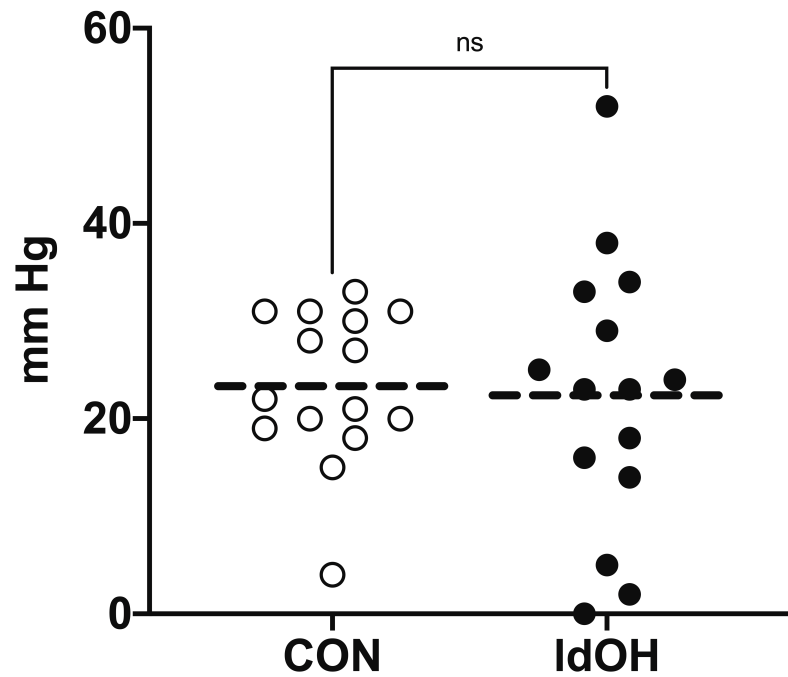

(B)  $\Delta\text{MBP}_{\text{VM2}}$

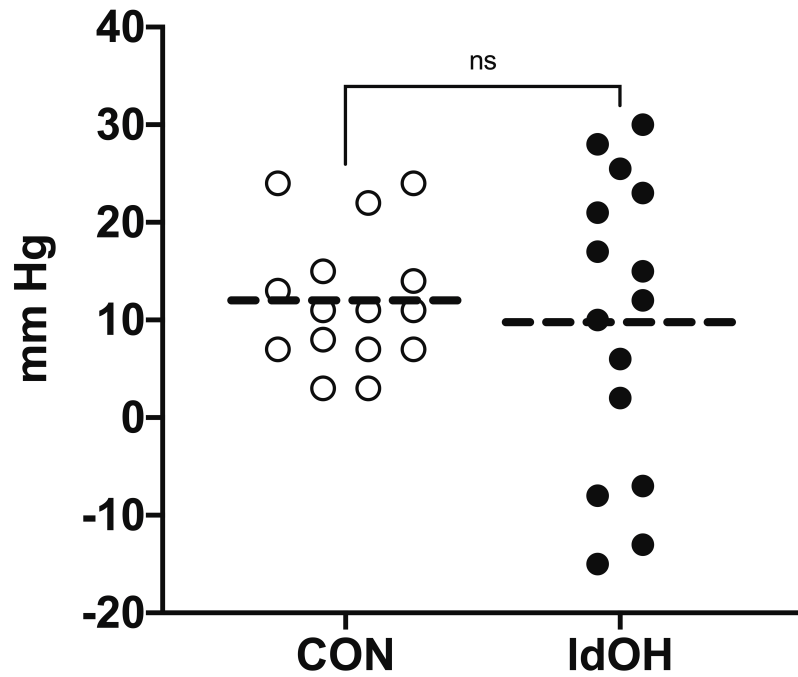

Figure S4

(A) Frequency distribution

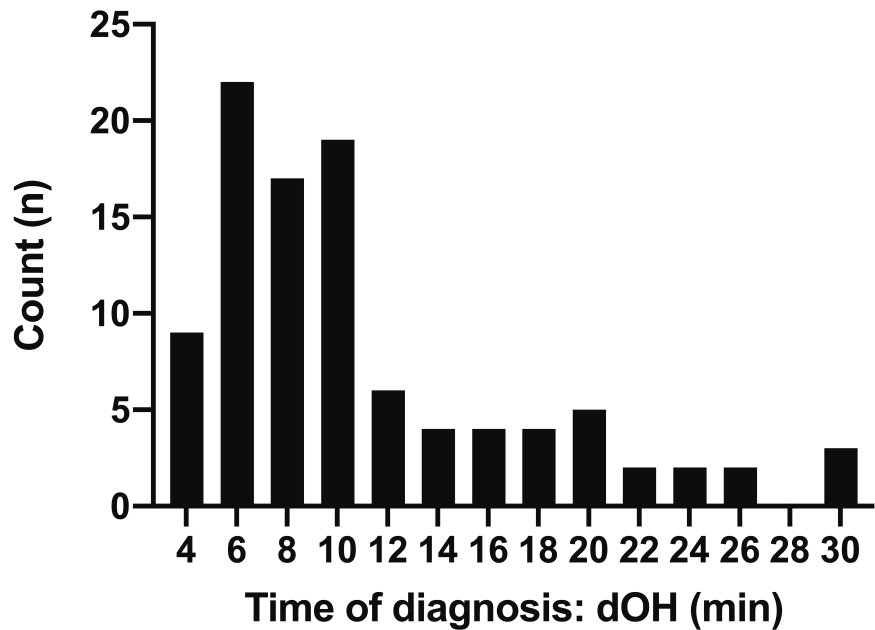

(B) Accumulative frequency distribution

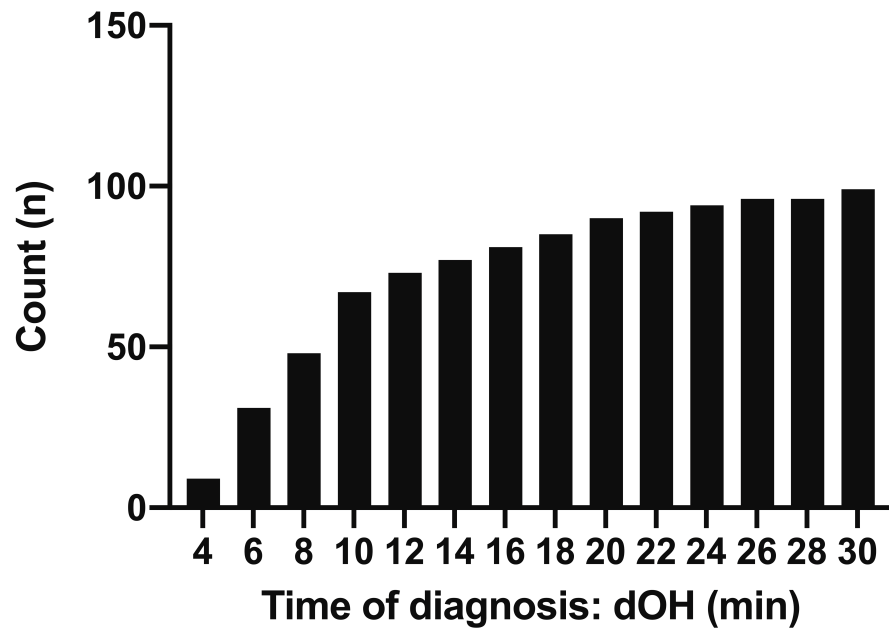

# Figure S5

(A) PRT

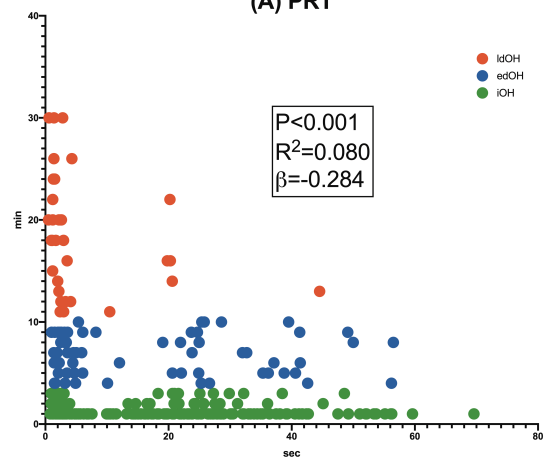

(B)  $\Delta SBP_{VM2}$

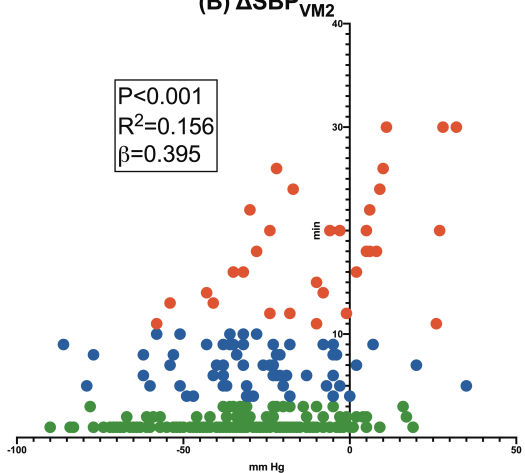

(C)  $\Delta DBP_{VM2}$

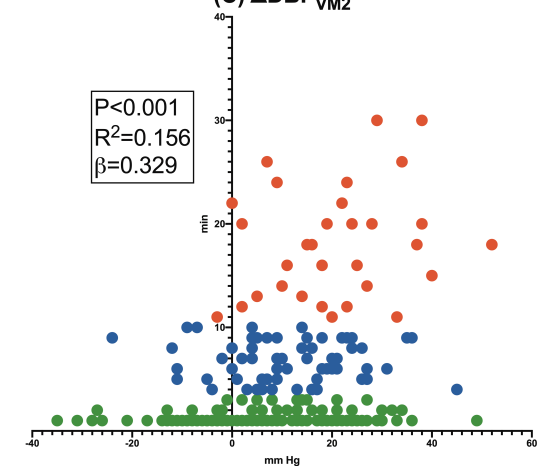

(D)  $\Delta MBP_{VM2}$

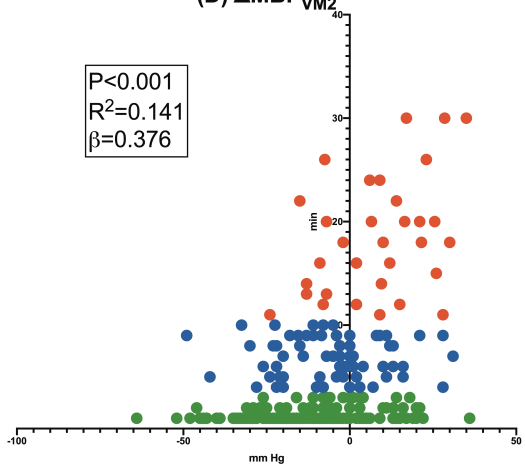

(E) BRSa

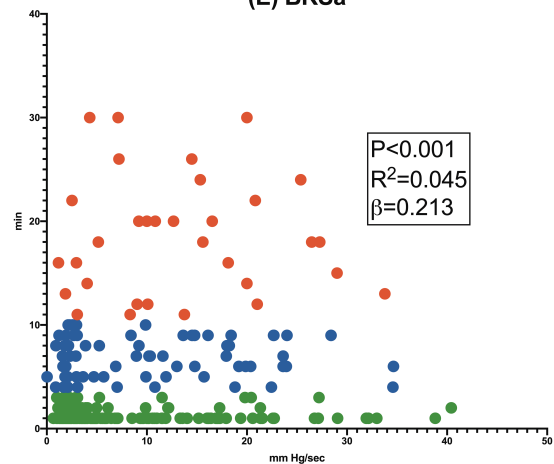

(F) BRSv

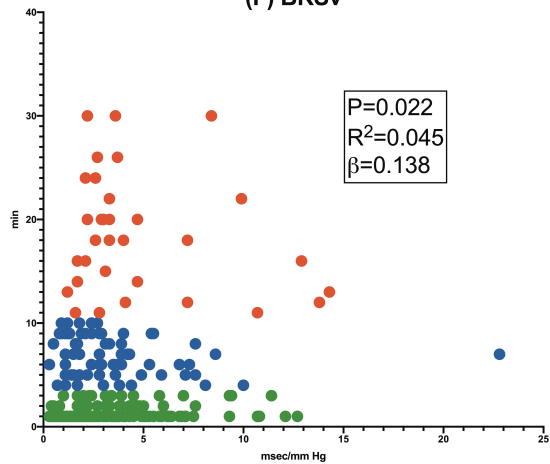

(G) Valsalva ratio

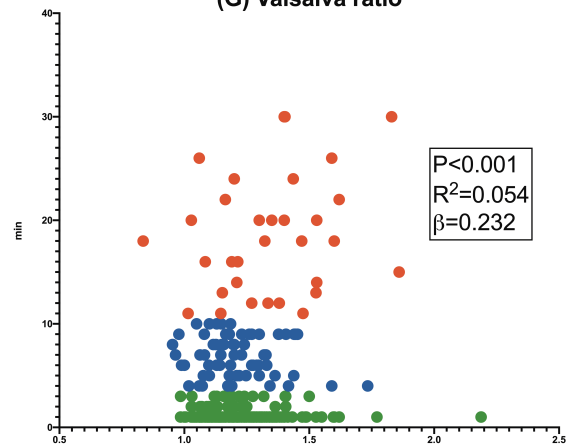

(H)  $\Delta HR_{VM3}$

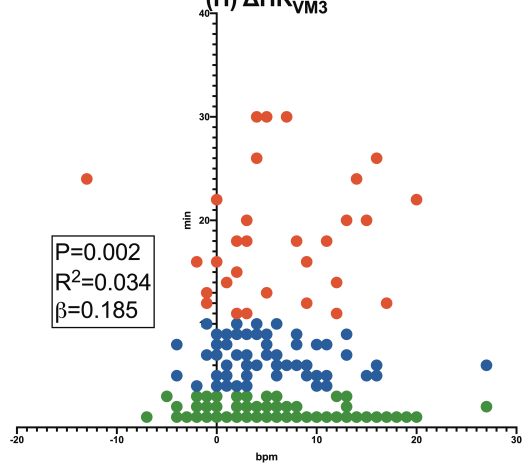

**Figure S6**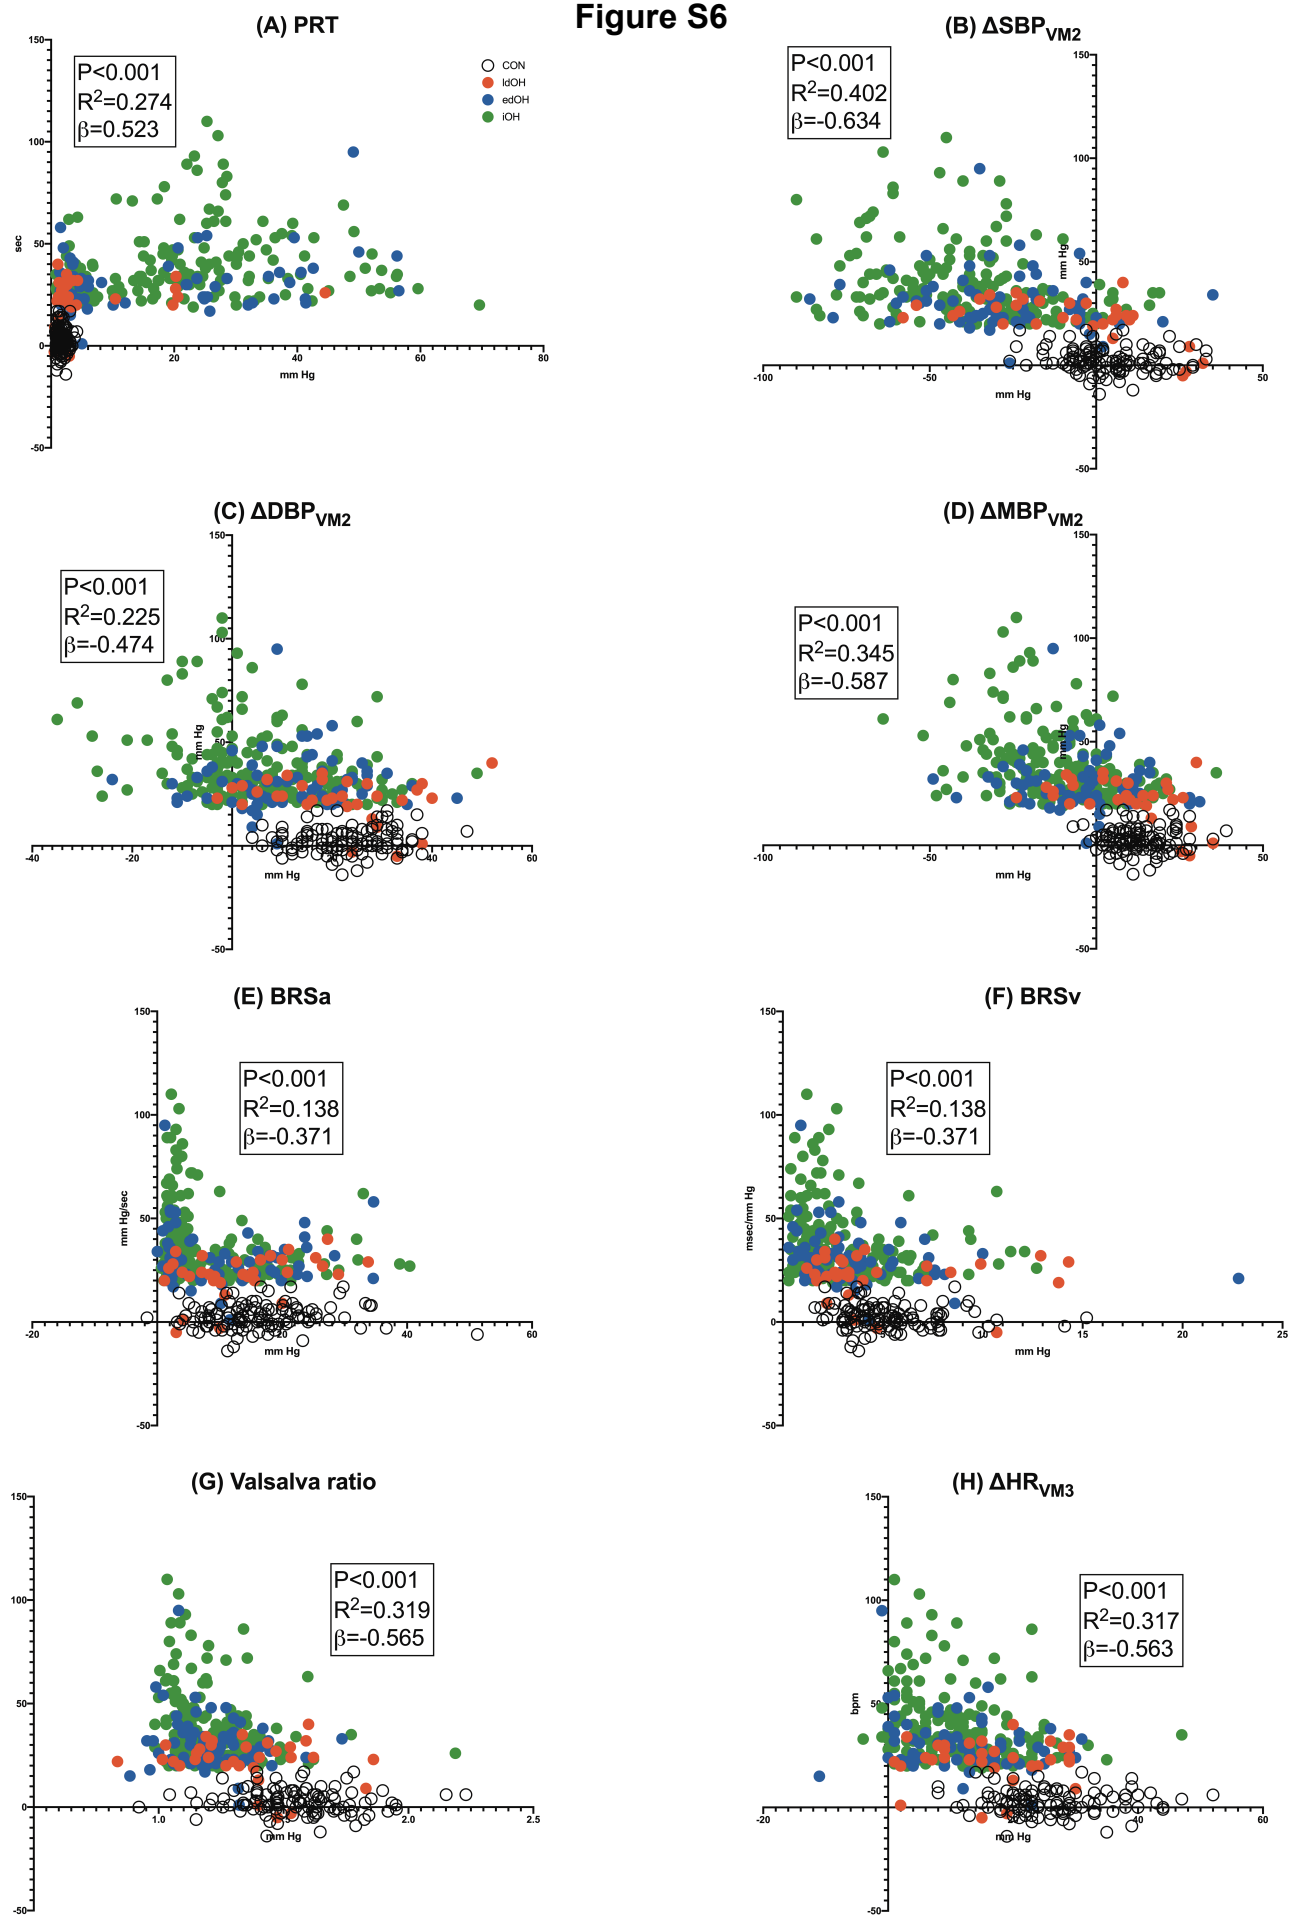

# Figure S7

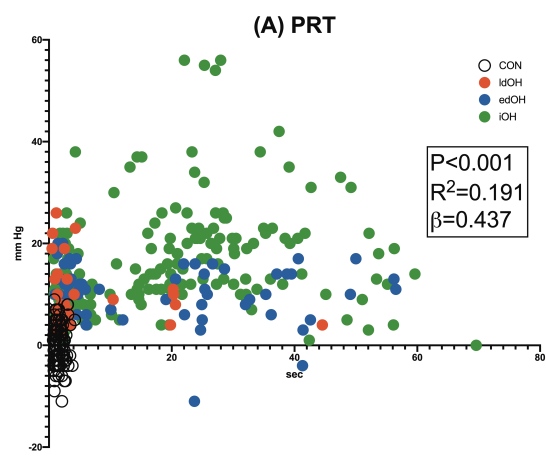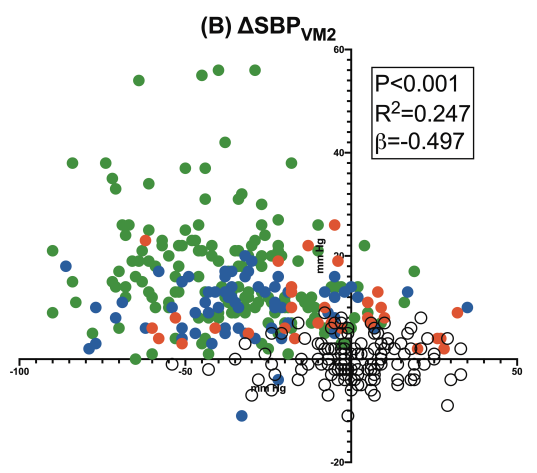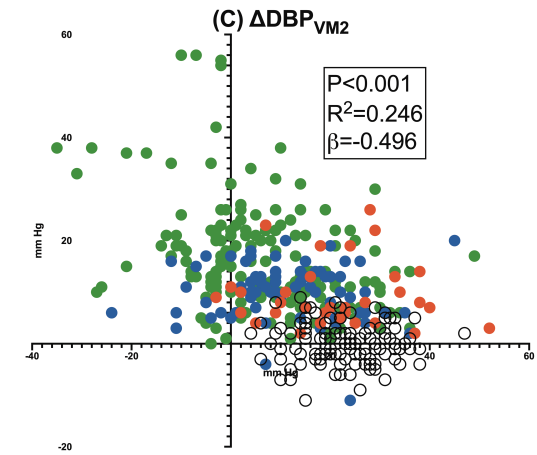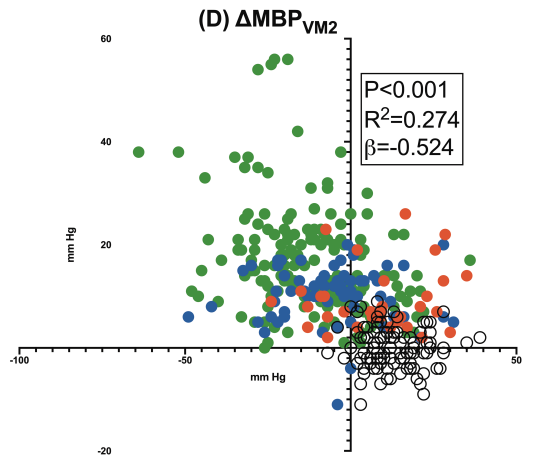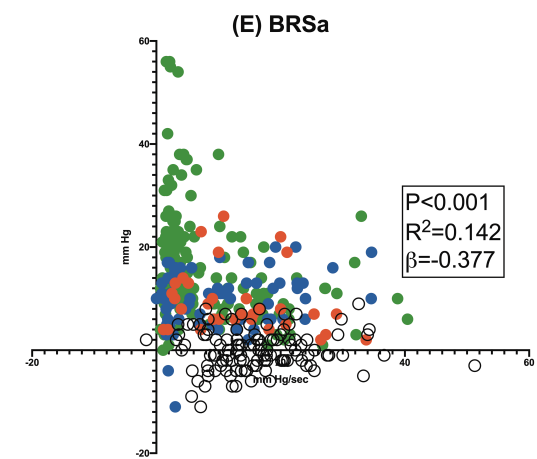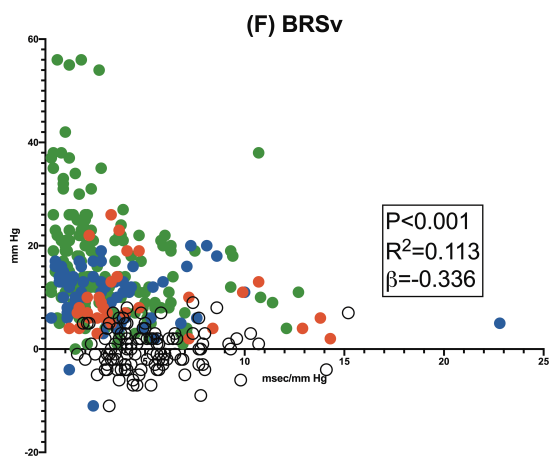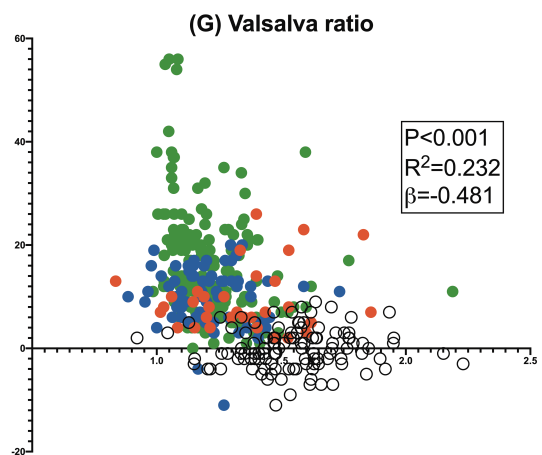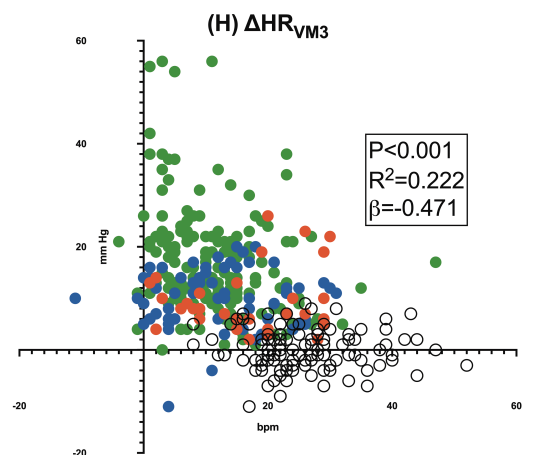

**Table S1. Valsalva metrics and HUTT by groups.**

|                                                                  | <b>Controls<br/>(n = 114)</b> | <b>Late-onset<br/>dOH<br/>(onset &gt; 10<br/>min)<br/>(n = 32)</b> | <b>Early-onset<br/>dOH<br/>(onset 3-10<br/>min)<br/>(n = 68)</b> | <b>Immediate<br/>OH<br/>(onset &lt; 3<br/>min)<br/>(n = 176)</b> | <b>P-value</b> |
|------------------------------------------------------------------|-------------------------------|--------------------------------------------------------------------|------------------------------------------------------------------|------------------------------------------------------------------|----------------|
| <b>PRT (sec)</b>                                                 | 1.7 ± 0.7                     | 5.9 ± 9.4                                                          | 16.3 ± 16.5                                                      | 20 ± 15.4                                                        | <0.001         |
| <b>ΔSBP<sub>VM2</sub><br/>(mm Hg)</b>                            | 3.4 ± 12.2                    | -9 ± 23.7                                                          | -28.8 ± 22.5                                                     | -36.6 ± 22.9                                                     | <0.001         |
| <b>ΔDBP<sub>VM2</sub><br/>(mm Hg)</b>                            | 22.7 ± 8.3                    | 20.8 ± 13.2                                                        | 11.2 ± 12.7                                                      | 6.6 ± 14                                                         | <0.001         |
| <b>ΔMBP<sub>VM2</sub><br/>(mm Hg)</b>                            | 12.9 ± 8.2                    | 8.2 ± 15.4                                                         | -5.5 ± 16.1                                                      | -11.1 ± 16.5                                                     | <0.001         |
| <b>BRSa (mm<br/>Hg/msec)</b>                                     | 16 ± 8.2                      | 13.3 ± 8.9                                                         | 10.4 ± 9                                                         | 7.5 ± 8                                                          | <0.001         |
| <b>BRSv<br/>(msec/mm<br/>Hg)</b>                                 | 5.2 ± 2.3                     | 4.8 ± 3.7                                                          | 3.4 ± 3.3                                                        | 3.1 ± 2.5                                                        | <0.001         |
| <b>VR</b>                                                        | 1.5 ± 0.2                     | 1.3 ± 0.2                                                          | 1.2 ± 0.2                                                        | 1.2 ± 0.2                                                        | <0.001         |
| <b>ΔHR<sub>VM3</sub><br/>(bpm)</b>                               | 26.1 ± 8.3                    | 16.5 ± 9.1                                                         | 11.9 ± 8.9                                                       | 11.2 ± 7.9                                                       | <0.001         |
| <b>Baseline HR<br/>(bpm)</b>                                     | 65.8 ± 7.6                    | 64.8 ± 11.4                                                        | 67.4 ± 11.3                                                      | 69.6 ± 12.7                                                      | NS             |
| <b>HRVdb</b>                                                     | 14.7 ± 5.5                    | 5.5 ± 3.9                                                          | 5.5 ± 4.1                                                        | 4.8 ± 3.2                                                        | <0.001         |
| <b>Time of<br/>diagnosis of<br/>OH (min)</b>                     | -                             | 18.5 ± 5.8                                                         | 6.9 ± 1.9                                                        | 1.3 ± 0.6                                                        | -              |
| <b>Magnitude of<br/>SBP drop<br/>during<br/>HUTT (mm<br/>Hg)</b> | 2.7 ± 5.8                     | 22.8 ± 10.3                                                        | 30.7 ± 13.2                                                      | 38.4 ± 17.6                                                      | <0.001         |
| <b>Magnitude of<br/>DBP drop<br/>during<br/>HUTT (mm<br/>Hg)</b> | 0 ± 3.9                       | 9.5 ± 6.3                                                          | 10.2 ± 5.5                                                       | 16.4 ± 10.4                                                      | <0.001         |

HRVdb, heart rate variability with deep breathing.
